# Supplementary material for: New-fashioned MnOx/g-C3N4@ZIF-8 catalyst for the liquid-phase selective oxidation of toluene in the absence of solvent or additives
Source: Royal Society of Chemistry journal article supplement (doi:10.1039/d5re00058k), 2025-01-01
Supplement: d5re00058k1.pdf [file d5re00058k1.pdf]

## Supplementary Material

**New-fashioned  $\text{MnO}_x/\text{g-C}_3\text{N}_4@\text{ZIF-8}$  catalyst for the liquid-phase selective oxidation of toluene in the absence of solvent and additives conditions**

Sihang Lu <sup>a</sup>, Wenkai Chen <sup>b,c</sup>, Gui Chen <sup>a,d\*</sup>, Shaobin Deng <sup>a</sup>, Dexuan Xiang <sup>a,d</sup>, Haizhou Zhang <sup>a,d</sup>, Yuanxiang Li <sup>a,d</sup>, Bailin Xiang <sup>a,d</sup>, Ye Yuan <sup>a,\*</sup>

<sup>a</sup> *College of Chemistry and Materials, Huaihua University, Huaihua 418000, P. R. China*

<sup>b</sup> *China Coal Research Institute Corporation Ltd., Beijing 100013, China*

<sup>c</sup> *National Energy Technology & Equipment Laboratory of Coal Utilization and Emission Control, Beijing 100013, China*

<sup>d</sup> *Hunan Engineering Laboratory for Preparation Technology of Polyvinyl Alcohol (PVA) Fiber Material, Huaihua University, Huaihua 418000, P. R. China*

**\* Corresponding author**

Tel.: +86-745-2851014.

*E-mail address:* cg@hhtc.edu.cn (G. Chen); yuanye@hhtc.edu.cn (Y. Yuan)

## 1. Experimental

### 1.1. Reagents and instrument

Melamine (AR, 99.0%) and zinc nitrate hexahydrate (AR, 99.0%) were obtained from Tianjin Komeo Chemical Reagent Co., Ltd, China. 2-methylimidazole (AR, 99.0%) was purchased from Rohn Reagent Co., Ltd, China. 50% manganese nitrate (AR, 99.0%) was afforded by Chengdu Jinshan Chemical Reagent Co., Ltd, China. The other reagents were purchased from the market. Micro high-pressure reactor (BE100) was provided by Shanghai LABE Instrument Co., Ltd, China. The products were analyzed by a gas chromatography (Agilent 7890B GC-FID).

### 2.2. Catalyst characterization

FT-IR spectrum was recorded using the Nicolet-380 in the 4000-400  $\text{cm}^{-1}$  range. SEM images were taken with a Sigma HD, Carl Zeiss (FE-SEM). XRD analyses were performed using the Rigaku Ultima IV X-ray powder diffractometer. XPS analyses were recorded using a 250Xi analyzer (Al  $K\alpha$  (1486.6 eV)). The textural properties of the samples were analyzed by  $\text{N}_2$  physisorption at 77 K in Quantachrome NOVA-2200e. The elemental content of all samples was analysed on a Thermo Scientific iCAP 7400 ICP-OES.

**Table S1** Comparison of catalytic performance of some different types of catalysts.

| Catalyst                                                 | Solvent/<br>(Initiator) | Oxidizer                      | Tem.<br>(°C) | Time<br>(h) | Con.<br>(%) | Sel. (%)  |       |      | Ref.         |
|----------------------------------------------------------|-------------------------|-------------------------------|--------------|-------------|-------------|-----------|-------|------|--------------|
|                                                          |                         |                               |              |             |             | BAL       | BOL   | BAC  |              |
| VO(acac) <sub>2</sub>                                    | Glacial acid            | H <sub>2</sub> O <sub>2</sub> | 90           | 4.0         | 19.8        | 50        | 6.1   | 22.2 | [1]          |
| Mn <sub>3</sub> O <sub>4</sub> /CNTs-3                   | TBHP                    | O <sub>2</sub>                | 90           | 12.0        | 24.63       | 43.5<br>1 | 46.98 | -    | [2]          |
| CeMnO <sub>x</sub>                                       | -                       | molecular<br>oxygen           | 180          | 4.0         | 7.0         | 51.1      |       | 44.5 | [3]          |
| Pt/ZrO <sub>2</sub>                                      | -                       | O <sub>2</sub>                | 90           | 3.0         | 37.2        | 19.6      | 6.5   | 70.4 | [4]          |
| Pd@C-GluA-550                                            | -                       | molecular<br>oxygen           | 160          | 7.0         | -           | 51.0      | -     | -    | [5]          |
| [TPPFe <sup>III</sup> ] <sub>2</sub> O                   | -                       | molecular<br>oxygen           | 165          | 3.75        | 7.36        | 59.06     |       | -    | [6]          |
| Mn@ZIF-8                                                 | -                       | molecular<br>oxygen           | 180          | 2.5         | 6.5         | 31.6      | 38.7  | 24.8 | [7]          |
| MnO <sub>x</sub> /g-C <sub>3</sub> N <sub>4</sub> @ZIF-8 | -                       | molecular<br>oxygen           | 180          | 2.0         | 4.7         | 36.2      | 38.1  | 18.2 | This<br>work |

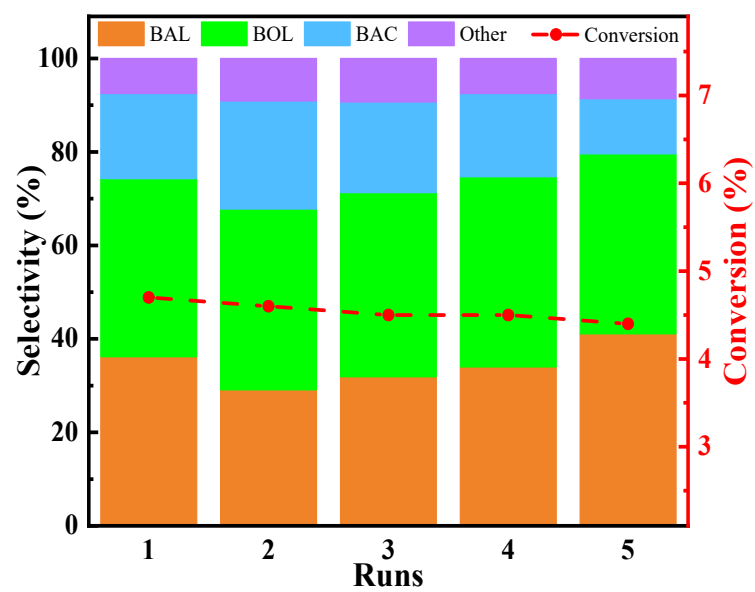

**Fig. S1** Recycling results of  $\text{MnO}_x/\text{g-C}_3\text{N}_4@\text{ZIF-8}$  catalysts.

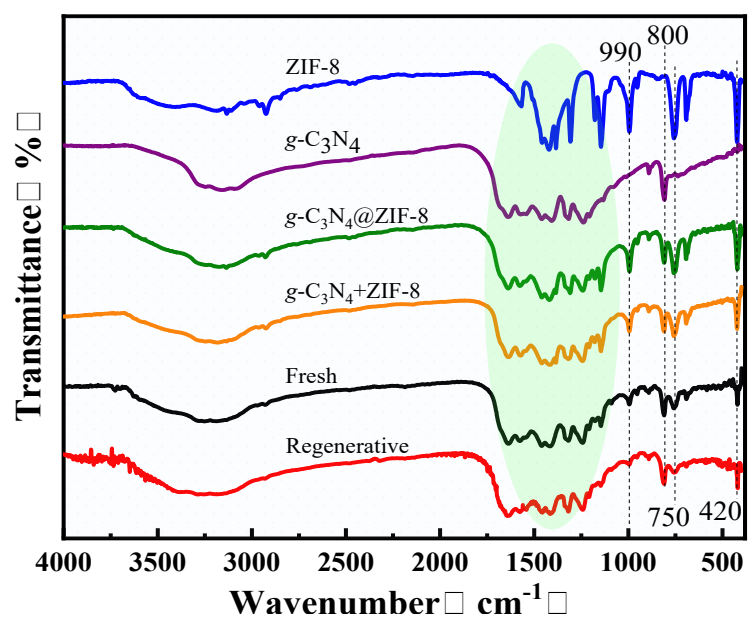

**Fig. S2** FT-IR spectra of different samples.

## References

- [1] X. Wang, J. Wu, M. Zhao, Y. Lv, G. Li, and C. Hu, *J. Chem. Phys.*, 2009, **113**, 14270-14278.
- [2] Y. Feng, and A. Zeng, *Catalysts*, 2020, **10**, 623-635.
- [3] G. Chen, K. You, F. Zhao, Z. Chen, and H. Luo, *Res. Chem. Intermediat.*, 2022, **48**, 2593-2606.
- [4] P. Zhang, Y. Gong, H. Li, Z. Chen, and Y. Wang, *Nat. Commun.*, 2013, **4**, 1593-1604.
- [5] N. Kumar, K. Naveen, A. Bhatia, S. Muthaiah, V. Siruguri, and A. Paul, *React. Chem. Eng.*, 2020, **5**, 1264-1271.
- [6] M. Ilyas, and M. Sadiq, *Catal. Lett.*, 2009, **128**, 337-342.
- [7] S. Deng, G. Chen, C. Liang, L. Wang, and B. Xiang, *Arab. J. Chem.*, 2023, **16**, 104666.
